# Supplementary material
Source: Research Square preprint supplement (doi:10.21203/rs.3.rs-8746098/v1)
Supplement: Supplementary file 1 [file 28bffda0d841b65838774447.docx]

| Additional Table1.Convergent Validity of the Measurement Model of Executive Function among Operating Room Nurses | | | | | |
| --- | --- | --- | --- | --- | --- |
| Path | | | Estimate | AVE | CR |
| P1Q6 | <--- | XPSS1 | 0.867 | 0.589 | 0.895 |
| P1Q5 | <--- | XPSS1 | 0.723 |
| P1Q4 | <--- | XPSS1 | 0.702 |
| P1Q3 | <--- | XPSS1 | 0.766 |
| P1Q2 | <--- | XPSS1 | 0.809 |
| P1Q1 | <--- | XPSS1 | 0.727 |
| P2Q1 | <--- | XPSS2 | 0.612 | 0.538 | 0.821 |
| P2Q2 | <--- | XPSS2 | 0.697 |
| P2Q3 | <--- | XPSS2 | 0.787 |
| P2Q4 | <--- | XPSS2 | 0.819 |
| C1 | <--- | MPSQI | 0.837 | 0.505 | 0.799 |
| C2 | <--- | MPSQI | 0.589 |
| C5 | <--- | MPSQI | 0.591 |
| C7 | <--- | MPSQI | 0.789 |
| D1 | <--- | YDEX | 0.929 | 0.771 | 0.943 |
| D2 | <--- | YDEX | 0.898 |
| D3 | <--- | YDEX | 0.914 |
| D4 | <--- | YDEX | 0.818 |
| D5 | <--- | YDEX | 0.826 |
| E1Q6 | <--- | WE1 | 0.865 | 0.684 | 0.928 |
| E1Q5 | <--- | WE1 | 0.882 |
| E1Q4 | <--- | WE1 | 0.835 |
| E1Q3 | <--- | WE1 | 0.829 |
| E1Q2 | <--- | WE1 | 0.8 |
| E1Q1 | <--- | WE1 | 0.745 |
| E2Q4 | <--- | WE2 | 0.817 | 0.514 | 0.757 |
| E2Q3 | <--- | WE2 | 0.732 |
| E2Q1 | <--- | WE2 | 0.582 |
| Note. XPSS1 and XPSS2 refer to two dimensions of the Perceived Stress Scale (PSS): XPSS1 represents Perceived Helplessness(items P1Q1–P1Q6), and XPSS2 represents Perceived Self-Efficacy (items P2Q1–P2Q4). WE1 and WE2 represent two dimensions of the Emotion Regulation Questionnaire (ERQ), where WE1 denotes Cognitive Reappraisal(items E1Q1–E1Q6) and WE2 denotes Expressive Suppression (items E2Q1, E2Q3, E2Q4).  MPSQI denotes the Pittsburgh Sleep Quality Index (PSQI), with four retained components—C1 (Subjective Sleep Quality), C2 (Sleep Latency), C5 (Sleep Disturbances), and C7 (Daytime Dysfunction). Items C3 and C6 were removed due to low factor loadings (< 0.50). YDEX represents the Dysexecutive Questionnaire (DEX), with five dimensions—D1 (Inhibition), D2 (Intentionality), D3 (Cognitive Disorganization), D4 (Resistance), and D5 (Social Behavior Regulation). Additionally, one ERQ item (E2Q2) under the Expressive Suppression factor was deleted due to a low factor loading (< 0.50).  All scale constructs demonstrated acceptable convergent validity, with AVE > 0.50 and CR > 0.70, supporting the adequacy of the measurement model for subsequent structural modeling analyses. | | | | | |

| Additional Table2. Discriminant Validity of the Measurement Model Executive Function among Operating Room Nurses | | | | | | |
| --- | --- | --- | --- | --- | --- | --- |
| Variables | XPSS1 | XPSS2 | WE1 | WE2 | PSQI | YDEX |
| XPSS1 | **0.589** | 0.2 | -0.066 | 0.332 | 0.579 | 0.587 |
| XPSS2 |  | **0.538** | -0.678 | -0.283 | 0.205 | 0.055 |
| WE1 |  |  | **0.684** | 0.432 | -0.15 | -0.024 |
| WE2 |  |  |  | **0.514** | 0.077 | 0.424 |
| PSQI |  |  |  |  | **0.505** | 0.35 |
| YDEX |  |  |  |  |  | **0.771** |
| Square root of AVE | 0.767 | 0.733 | 0.827 | 0.717 | 0.711 | 0.878 |
| Note.XPSS1 and XPSS2 represent the two dimensions of the Perceived Stress Scale (PSS), where XPSS1 refers to Perceived Helplessness and XPSS2 refers to Perceived Self‑Efficacy;WE1 and WE2 represent the two dimensions of the Emotion Regulation Questionnaire (ERQ), where WE1 denotes Cognitive Reappraisal and WE2 denotes Expressive Suppression;PSQI indicates the Pittsburgh Sleep Quality Index;YDEX indicates the Dysexecutive Questionnaire measuring executive dysfunction.The bold diagonal values indicate the AVE results for each construct, and the square root of AVE values are presented in the final row.  Discriminant validity is supported when the square root of AVE for each construct (diagonal values) exceeds its correlations with other constructs. | | | | | | |

| Additional Table 3. Model Fit Results of the Measurement Model of Executive Function among Operating Room Nurses | | | | | | | |
| --- | --- | --- | --- | --- | --- | --- | --- |
| Fit Index | NFI | RFI | IFI | TLI | CFI | *χ*2/df | RMSE |
| Recommended value | ＞ 0.90 = excellent; ＞ 0.80 = acceptable | | | | | 1-3= excellent | ＜0.05= excellent，＜0.08= excellent |
| Observed value | 0.865 | 0.848 | 0.94 | 0.931 | 0.939 | 1.699 | 0.057 |
| Model evaluation | Acceptable | Acceptable | Excellent | Excellent | Excellent | Excellent | Acceptable |

| Additional Table 4. Comparison of executive dysfunction scores by demographic characteristics among operating room nurses (n = 216) | | | | | |
| --- | --- | --- | --- | --- | --- |
| Variable | Category | n (%) | Mean ± SD | t/F | P value |
| Gender | Male | 36 (16.67%) | 27.69±17.08 | 1.714 | 0.088 |
| Female | 180 (83.33%) | 23.25±13.57 |  |  |
| Working hours（h/d） | ≤8 | 75 (34.72%) | 21.97±12.41 | -1.613 | 0.108 |
| ＞8 | 141 (65.28%) | 25.06±15.09 |  |  |
| Age（yars） | 18-25 | 19 (8.80%) | 20.42±10.76 | 0.877 | 0.478 |
| 26-30 | 59 (27.31%) | 25.31±13.44 |  |  |
| 31-40 | 105 (48.61%) | 24.47±15.15 |  |  |
| 41-50 | 28 (12.96%) | 23.32±15.19 |  |  |
| ＞50 | 5 (2.31%) | 15.80±9.65 |  |  |
| Education level | Bachelor’s degree | 195 (90.28%) | 24.25±14.29 | 0.422 | 0.656 |
| Master’s degree | 3 (1.39%) | 18.33±14.57 |  |  |
| Associate degree | 18 (8.33%) | 22.11±14.5 |  |  |
| Marital status | Married | 164 (75.93%) | 24.35±14.85 | 0.544 | 0.581 |
| Unmarried | 49 (22.69%) | 23.27±12.49 |  |  |
| Divorced | 3 (1.39%) | 16.33±7.77 |  |  |
| Years of service(years) | ＜5 | 29 (13.43%) | 23.93±11.61 | 0.041 | 0.96 |
| 5--10 | 119 (55.09%) | 24.23±15.49 |  |  |
| ＞10 | 68 (31.48%) | 23.6±13.18 |  |  |
| Professional title | Nurse | 12 (5.56%) | 27.67±13.73 | 1.065 | 0.375 |
| Junior nurse | 81 (37.50%) | 24.11±14.81 |  |  |
| Senior nurse | 109 (50.46%) | 24.25±14.29 |  |  |
| Associate chief nurse | 12 (5.56%) | 19.75±10.30 |  |  |
| Chief nurse | 2 (0.93%) | 8.50±7.78 |  |  |
| Position | Staff nurse | 161 (74.54%) | 24.81±15.09 | 1.052 | 0.351 |
| Team leader | 37 (17.13%) | 21.84±11.98 |  |  |
| Head nurse | 18 (8.33%) | 21.11±10.02 |  |  |
| Physical exercise | Never | 34 (15.74%) | 24.68±14.52 | 0.786 | 0.503 |
| Occasionally | 140 (64.81%) | 20.55±11.96 |  |  |
| Frequently | 31 (14.35%) | 22.45±17.99 |  |  |
| Daily | 11 (5.09%) | 23.99±14.27 |  |  |
| Caffeine intake | Never | 22 (10.19%) | 28.45±17.34 | 0.761 | 0.521 |
| Occasionally | 116 (53.70%) | 23.25±13.1 |  |  |
| Frequently | 53 (24.54%) | 22.87±12.43 |  |  |
| Daily | 25 (11.57%) | 25.88±19.37 |  |  |
| Data are presented as mean ± standard deviation (SD). Independent‑sample t‑test or one‑way ANOVA was used as appropriate. | | | | | |

| Additional Table 5. Correlations between sleep quality, perceived stress, emotion regulation, and executive dysfunction among operating room nurses (n = 216) | | | | | | | | | | | | | | |
| --- | --- | --- | --- | --- | --- | --- | --- | --- | --- | --- | --- | --- | --- | --- |
| Variable | DEX | PISQ | Subjective sleep quality | Sleep latency | Sleep duration | Sleep disturbance | Use of sleeping medication | Daytime dysfunction | PSS | Perceived helplessness | Perceived  self‑efficacy | ERQ | Cognitive Reappraisal | Expressive Suppression |
| DEX | 1 |  |  |  |  |  |  |  |  |  |  |  |  |  |
| PISQ | .359** | 1 |  |  |  |  |  |  |  |  |  |  |  |  |
| Subjective sleep quality | .274** | .871** | 1 |  |  |  |  |  |  |  |  |  |  |  |
| Sleep latency | .198** | .691** | .530** | 1 |  |  |  |  |  |  |  |  |  |  |
| Sleep duration | .159* | .576** | .372** | .216** | 1 |  |  |  |  |  |  |  |  |  |
| Sleep disturbance | .310** | .622** | .480** | .449** | .173* | 1 |  |  |  |  |  |  |  |  |
|  |  |  |  |  |  |  |  |  |  |  |  |  |  |  |
| Use of sleeping medication | .298** | .412** | .334** | .184** | .228** | .285** | 1 |  |  |  |  |  |  |  |
| Daytime dysfunction | .330** | .830** | .682** | .405** | .469** | .426** | .251** | 1 |  |  |  |  |  |  |
| PSS | .474** | .455** | .359** | .325** | .155* | .363** | .308** | .404** | 1 |  |  |  |  |  |
| Perceived helplessness | .494** | .486** | .393** | .308** | .189** | .373** | .260** | .475** | .825** | 1 |  |  |  |  |
| Perceived  self‑efficacy | .179** | .202** | .143* | .196** | 0.084 | .141* | .160* | .141* | .651** | .187** | 1 |  |  |  |
| ERQ | 0.037 | -0.122 | -0.1 | -.157* | -0.046 | -0.084 | -0.073 | -0.054 | -.212** | 0.028 | -.492** | 1 |  |  |
| Cognitive Reappraisal | -.195** | -.218** | -.162* | -.232** | -0.102 | -.148* | -.162* | -0.121 | -.383** | -0.131 | -.573** | .839** | 1 |  |
| Expressive Suppression | .358** | 0.076 | 0.04 | -0.002 | 0.035 | 0.086 | 0.078 | 0.086 | 0.113 | .267** | -.187** | .711** | .254** | 1 |
| Note: Values represent Pearson correlation coefficients.P< 0.05 (), P < 0.01 (**). DEX: Dysexecutive Questionnaire; PSQI: Pittsburgh Sleep Quality Index; PSS: Perceived Stress Scale; ERQ: Emotion Regulation Questionnaire. | | | | | | | | | | | | | | |

| Additional Table6.Model Fit | | |
| --- | --- | --- |
| Indicator | Reference Standard | Measured Result |
| *χ*2/df | 1-3 = excellent，3-5= acceptable | 1.728 |
| RMSEA | ＜0.05 = excellent，＜0.08= acceptable | 0.058 |
| IFI | ＞ 0.90 = excellent; ＞ 0.80 = acceptable | 0.937 |
| TLI | ＞ 0.90 = excellent; ＞ 0.80 = acceptable | 0.929 |
| CFI | ＞ 0.90 = excellent; ＞ 0.80 = acceptable | 0.936 |
| NFI | ＞ 0.90 = excellent; ＞ 0.80 = acceptable | 0.862 |
| RFI | ＞ 0.90 = excellent; ＞ 0.80 = acceptable | 0.846 |
